# Supplementary material for: MiasDB: A Database of Molecular Interactions Associated with Alternative Splicing of Human Pre-mRNAs
Source: PLoS One. 2016 May 11;11(5):e0155443. doi: 10.1371/journal.pone.0155443 (PMC4864242; doi:10.1371/journal.pone.0155443)
Supplement: S1 Table — (XLSX) [file pone.0155443.s003.xlsx]

## Sheet: Sheet1
ID	Organism	HGNC Gene Name	Hyperlink	Synonymous gene name	Partner A	Description of A	Partner B	Description of B	Technique Attribute	AS Pattern	Type of interaction	Tissue-specific and disease	Functional description	Reference	PMID	Hyperlink
num_1	Human	SNRNP48	http://www.genenames.org/cgi-bin/gene_symbol_report?hgnc_id=HGNC:21368	dJ336K20B.1, dJ512B11.2, FLJ32234, U11/U12 snRNP 48K	hn RNP H1	Heterogeneous nuclear ribonucleoprotein H1	G-run	G-run in exon 4i	Protein–RNA crosslinking	ES	Physical	NA	Inhibit exon 4i inclusion in the U11-48K (SNRNP48) pre-mRNA	Turunen JJ, Verma B, et al. RNA,2013,19(3):380-389[PMID:23335637]	PMID:23335637	http://www.ncbi.nlm.nih.gov/pubmed/?term=23335637
num_2	Human	SNRNP48	http://www.genenames.org/cgi-bin/gene_symbol_report?hgnc_id=HGNC:21368	dJ336K20B.1, dJ512B11.2, FLJ32234, U11/U12 snRNP 48K	hn RNP H2	Heterogeneous nuclear ribonucleoprotein H2	G-run	G-run in exon 4i	Protein–RNA crosslinking	ES	Physical	NA	Inhibit exon 4i inclusion in the U11-48K (SNRNP48) pre-mRNA	Turunen JJ, Verma B, et al. RNA,2013,19(3):380-389[PMID:23335637]	PMID:23335637	http://www.ncbi.nlm.nih.gov/pubmed/?term=23335637
num_3	Human	SNRNP48	http://www.genenames.org/cgi-bin/gene_symbol_report?hgnc_id=HGNC:21368	dJ336K20B.1, dJ512B11.2, FLJ32234, U11/U12 snRNP 48K	hn RNP F	Heterogeneous nuclear ribonucleoprotein H2	G-run	G-run in exon 4i	Protein–RNA crosslinking	ES	Physical	NA	Inhibit exon 4i inclusion in the U11-48K (SNRNP48) pre-mRNA	Turunen JJ, Verma B, et al. RNA,2013,19(3):380-389[PMID:23335637]	PMID:23335637	http://www.ncbi.nlm.nih.gov/pubmed/?term=23335637
num_4	Human	SNRNP48	http://www.genenames.org/cgi-bin/gene_symbol_report?hgnc_id=HGNC:21368	dJ336K20B.1, dJ512B11.2, FLJ32234, U11/U12 snRNP 48K	U1 snRNP	Small nuclear ribonucleoprotein particle U1	5 apostrophess	Locates in downstream from the exon 4i	Psoralen crosslinking, Northern blotting	ES	Physical	NA	U1 and hnRNPH1/H2 inhibit each other from binding to exon 4i. U1 snRNP bound at the 5 apostrophess can sterically interfere with the recognition of the 3 apostrophess.	Turunen JJ, Verma B, et al. RNA,2013,19(3):380-389[PMID:23335637]	PMID:23335637	http://www.ncbi.nlm.nih.gov/pubmed/?term=23335637
num_5	Human	SNRNP48	http://www.genenames.org/cgi-bin/gene_symbol_report?hgnc_id=HGNC:21368	dJ336K20B.1, dJ512B11.2, FLJ32234, U11/U12 snRNP 48K	U11 snRNP	Low-abundance small nuclear ribonucleoprotein particle U11	USSE	U11 snRNP-binding splicing enhancer	Protein–RNA crosslinking	ES	Physical	NA	Promote exon 4i inclusion by enhancing the binding of U2-type factors to upstream of exon 4i	Turunen JJ, Verma B, et al. RNA,2013,19(3):380-389[PMID:23335637]	PMID:23335637	http://www.ncbi.nlm.nih.gov/pubmed/?term=23335637
num_6	Human	SNRNP48	http://www.genenames.org/cgi-bin/gene_symbol_report?hgnc_id=HGNC:21368	dJ336K20B.1, dJ512B11.2, FLJ32234, U11/U12 snRNP 48K	U11/U12 snRNP	Low-abundance small nuclear ribonucleoprotein particle U11/U12 di-snRNP	USSE	U11 snRNP-binding splicing enhancer	Protein–RNA crosslinking	ES	Physical	NA	Promote exon 4i inclusion by enhancing the binding of U2-type factors to upstream of exon 4i	Turunen JJ, Verma B, et al. RNA,2013,19(3):380-389[PMID:23335637]	PMID:23335637	http://www.ncbi.nlm.nih.gov/pubmed/?term=23335637
num_7	Human	SNRNP48	http://www.genenames.org/cgi-bin/gene_symbol_report?hgnc_id=HGNC:21368	dJ336K20B.1, dJ512B11.2, FLJ32234, U11/U12 snRNP 48K	SNRNP35	It is also known as U11-35K. A paralog of the U1-70K protein.	SNRNP48	It is also known as U11-48K. It locats in the U11/U12 di-snRNP.	Coimmunoprecipitation	ES	Physical	NA	Activate the upstream 3 apostrophess	Niemelä EH, Verbeeren J, et al. RNA Biol,2015,12(11):1256-1264.[PMID:26479860]	PMID:26479860	http://www.ncbi.nlm.nih.gov/pubmed/?term=26479860
num_8	Human	SNRNP48	http://www.genenames.org/cgi-bin/gene_symbol_report?hgnc_id=HGNC:21368	dJ336K20B.1, dJ512B11.2, FLJ32234, U11/U12 snRNP 48K	SNRNP48	It is also known as U11-48K. It locats in the U11/U12 di-snRNP.	USSE	U11 snRNP-binding splicing enhancer	Coimmunoprecipitation	ES	Physical	NA	Activate the upstream 3 apostrophess	Niemelä EH, Verbeeren J, et al. RNA Biol,2015,12(11):1256-1264.[PMID:26479860]	PMID:26479860	http://www.ncbi.nlm.nih.gov/pubmed/?term=26479860
num_9	Human	RNPC3	http://www.genenames.org/cgi-bin/gene_symbol_report?hgnc_id=HGNC:18666	FLJ20008, KIAA1839, RBM40, SNRNP65, U11/U12 snRNP 65K	U11 snRNP	Low-abundance small nuclear ribonucleoprotein particle U11	USSE	U11 snRNP-binding splicing enhancer	Protein–RNA crosslinking	ES	Physical	NA	Promote the formation of a long 3 apostrophe UTR.	Verbeeren J, Niemelä EH, et al. Mol Cell,2010,37(6):821-833.[PMID:20347424]	PMID:20347424	http://www.ncbi.nlm.nih.gov/pubmed/?term=20347424
num_10	Human	RNPC3	http://www.genenames.org/cgi-bin/gene_symbol_report?hgnc_id=HGNC:18666	FLJ20008, KIAA1839, RBM40, SNRNP65, U11/U12 snRNP 65K	SNRNP35	It is also known as U11-35K. A paralog of the U1-70K protein.	SNRNP48	It is also known as U11-48K. It locats in the U11/U12 di-snRNP.	Coimmunoprecipitation	ES	Physical	NA	Activate the upstream 3 apostrophess	Niemelä EH, Verbeeren J, et al. RNA Biol,2015,12(11):1256-1264.[PMID:26479860]	PMID:26479860	http://www.ncbi.nlm.nih.gov/pubmed/?term=26479860
num_11	Human	RNPC3	http://www.genenames.org/cgi-bin/gene_symbol_report?hgnc_id=HGNC:18666	FLJ20008, KIAA1839, RBM40, SNRNP65, U11/U12 snRNP 65K	SNRNP48	It is also known as U11-48K. It locats in the U11/U12 di-snRNP.	USSE	U11 snRNP-binding splicing enhancer	Coimmunoprecipitation	ES	Physical	NA	Activate the upstream 3 apostrophess	Niemelä EH, Verbeeren J, et al. RNA Biol,2015,12(11):1256-1264.[PMID:26479860]	PMID:26479860	http://www.ncbi.nlm.nih.gov/pubmed/?term=26479860
num_12	Human	NA	NA	NA	RNPC3	It is also known as U11/U12-65K. It locats in the U11/U12 di-snRNP.	U12 snRNA	small nuclear RNA	NA	NA	Physical	NA	U11/U12-65K directly binds to the 3 apostrophe terminal stem loop of U12 snRNA.	Benecke H, Luhrmann R, et al. EMBO J,2005,24(17):3057-3069[PMID:16096647]	PMID:16096647	http://www.ncbi.nlm.nih.gov/pubmed/?term=16096647
num_13	Human	NA	NA	NA	RNPC3	It is also known as U11/U12-65K. It locats in the U11/U12 di-snRNP.	PDCD7	It is also known as U11-59K. It locats in the U11/U12 di-snRNP.	NA	NA	Physical	NA	NA	Benecke H, Luhrmann R, et al. EMBO J,2005,24(17):3057-3069[PMID:16096647]	PMID:16096647	http://www.ncbi.nlm.nih.gov/pubmed/?term=16096647
num_14	Human	NA	NA	NA	PDCD7	It is also known as U11-59K. It locats in the U11/U12 di-snRNP.	SNRNP48	It is also known as U11-48K. It locats in the U11/U12 di-snRNP.	NA	NA	Physical	NA	NA	Turunen JJ, Will CL, et al. Mol Cell Biol,2008,28(10):3548-3560.[PMID:18347052]	PMID:18347052	http://www.ncbi.nlm.nih.gov/pubmed/?term=18347052
num_15	Human	NA	NA	NA	U4atac snRNP	Small nuclear ribonucleoprotein particle U4atac	U5 snRNP	Small nuclear ribonucleoprotein particle U5	NA	NA	Physical	NA	NA	Schneider C, Will CL, et al. Mol Cell Biol,2002,22:3219-3229.[PMID:11971955]	PMID:11971955	http://www.ncbi.nlm.nih.gov/pubmed/?term=11971955
num_16	Human	NA	NA	NA	U4atac snRNP	Small nuclear ribonucleoprotein particle U4atac	U6atac snRNP	Small nuclear ribonucleoprotein particle U6atac	NA	NA	Physical	NA	NA	Schneider C, Will CL, et al. Mol Cell Biol,2002,22:3219-3229.[PMID:11971955]	PMID:11971955	http://www.ncbi.nlm.nih.gov/pubmed/?term=11971955
num_17	Human	NA	NA	NA	U5 snRNP	Small nuclear ribonucleoprotein particle U5	U6atac snRNP	Small nuclear ribonucleoprotein particle U6atac	NA	NA	Physical	NA	NA	Schneider C, Will CL, et al. Mol Cell Biol,2002,22:3219-3229.[PMID:11971955]	PMID:11971955	http://www.ncbi.nlm.nih.gov/pubmed/?term=11971955
num_18	Human	NA	NA	NA	U11 snRNP	Small nuclear ribonucleoprotein particle U11	U12 snRNP	Small nuclear ribonucleoprotein particle U12	NA	NA	Physical	NA	NA	Wassarman KM and Steitz JA. Mol Cell Biol,1992,12:1276-1285.[PMID:1372090]	PMID:1372090	http://www.ncbi.nlm.nih.gov/pubmed/?term=1372090
num_19	Human	NA	NA	NA	U12 snRNP	Small nuclear ribonucleoprotein particle U12	U6atac snRNP	Small nuclear ribonucleoprotein particle U6atac	NA	NA	Physical	NA	Form the catalytic core structure.	Turunen JJ, Niemelä EH, et al. WIREs RNA,2013,4:61-76.[PMID:23074130]	PMID:23074130	http://www.ncbi.nlm.nih.gov/pubmed/?term=23074130
num_20	Human	NA	NA	NA	U12 snRNP	Small nuclear ribonucleoprotein particle U12	U5 snRNP	Small nuclear ribonucleoprotein particle U5	NA	NA	Physical	NA	Form the catalytic core structure.	Turunen JJ, Niemelä EH, et al. WIREs RNA,2013,4:61-76.[PMID:23074130]	PMID:23074130	http://www.ncbi.nlm.nih.gov/pubmed/?term=23074130
num_21	Human	NA	NA	NA	U6atac snRNP	Small nuclear ribonucleoprotein particle U6atac	5 apostrophe ss	5 apostrophe splice site	NA	NA	Physical	NA	NA	Incorvaia R and Padgett RA. RNA,1998,4(6):709-718.[PMID:9622129]	PMID:9622129	http://www.ncbi.nlm.nih.gov/pubmed/?term=9622129
num_22	Human	NA	NA	NA	SNRNP48	It is also known as U11-48K. It locats in the U11/U12 di-snRNP.	5 apostrophe ss	5 apostrophe splice site	NA	NA	Physical	NA	Stabilizes the U11/5 ss helix	Turunen JJ, Will CL, et al. Mol Cell Biol,2008,28(10):3548-3560. [PMID:18347052]	PMID:18347052	http://www.ncbi.nlm.nih.gov/pubmed/?term=18347052
num_23	Human	NA	NA	NA	U12 snRNP	Small nuclear ribonucleoprotein particle U12	BPS	branch point sequences	NA	NA	Physical	NA	Resulting in the exclusion of the branch point (BP) adenosine from the U12/BPS helix.	Tarn WY and Steitz JA. Cell,1996,84:801-811.[PMID:8625417]	PMID:8625417	http://www.ncbi.nlm.nih.gov/pubmed/?term=8625417
num_24	Human	NA	NA	NA	SF3b	Splicing factor 3b	BPS	branch point sequences	NA	NA	Physical	NA	BPS recognition is likely stabilized by proteins of the SF3b complex.	Will CL, Schneider C, et al. Science,1999,284:2003-2005.[PMID:10373121]	PMID:10373121	http://www.ncbi.nlm.nih.gov/pubmed/?term=10373121
num_25	Human	NA	NA	NA	SNRNP48	It is also known as U11-48K. It locats in the U11/U12 di-snRNP.	SRp34	SRSF1 homologs	NA	NA	Physical	NA	Stabilizing U11/5 ss binding	Lorkovic ZJ, Lopato S, et al. J Biol Chem,2004,279(32):33890-3388.[PMID:15166240]	PMID:15166240	http://www.ncbi.nlm.nih.gov/pubmed/?term=15166240
num_26	Human	NA	NA	NA	SNRNP48	It is also known as U11-48K. It locats in the U11/U12 di-snRNP.	USSE	U11 snRNP-binding splicing enhancer	NA	NA	Physical	NA	Promoting 5 apostrophe ss recognition of minor splicing and the splicing factors recruitment of major splicing to the upstream 3 apostrophess.	Turunen JJ, Niemelä EH, et al. WIREs RNA,2013,4:61-76.[PMID:23074130]	PMID:23074130	http://www.ncbi.nlm.nih.gov/pubmed/?term=23074130
num_27	Human	NA	NA	NA	SF3b155	Splicing factor 3b155	SF3b14	Splicing factor 3b14. It was also known as p14.	NA	NA	Physical	NA	Forming p14/SF3b155 peptide complex.	Will CL, Schneider C, et al. EMBO J,2001,20(16):4536-4546.[PMID:11500380]	PMID:11500380	http://www.ncbi.nlm.nih.gov/pubmed/?term=11500380
num_28	Human	NA	NA	NA	SF3b14	Splicing factor 3b14. It was also known as p14.	Branch adenosine	Adenosine in branch point sequences	NA	NA	Physical	NA	SF3b14 shields the BP adenosine from premature activation.	Will CL, Schneider C, et al. EMBO J,2001,20(16):4536-4546.[PMID:11500380]	PMID:11500380	http://www.ncbi.nlm.nih.gov/pubmed/?term=11500380
num_29	Human	NA	NA	NA	Urp	U2AF35-related protein	3 apostrophe ss	3 apostrophe splice site	NA	NA	Physical	NA	Promote the formation of U12-type spliceosomal complexes or specifically required for the second step of U2-type splicing.	Shen H, Zheng X, et al. Genes & Development,2010,24:2389-2394[PMID:21041408]	PMID:21041408	http://www.ncbi.nlm.nih.gov/pubmed/?term=21041408
